# Supplementary material for: Effect of Lewis acid on the structure of a diiron dithiolate complex based on the active site of [FeFe]-hydrogenase assessed by density functional theory
Source: Royal Society of Chemistry journal article supplement (doi:10.1039/b905786b), 2009-01-01
Supplement: b905786b.pdf [file b905786b.pdf]

## Supplementary Information

# Effect of Lewis Acid on the Structure of a Diiron Dithiolate Complex Based on the Active Site of [FeFe]- Hydrogenase Assessed by Density Functional Theory

*Jin Woo Lee and Won Ho Jo\**

Hyperstructured Organic Materials Research Center and Department of Materials Science and  
Engineering, Seoul National University, Seoul 151-742, Korea

E-mail: [whjpoly@snu.ac.kr](mailto:whjpoly@snu.ac.kr)

**Cartesian coordinates and total energies (in a.u.) of all molecules from DFT calculations**

|                                                 |        |        |        |                                                 |        |        |        |
|-------------------------------------------------|--------|--------|--------|-------------------------------------------------|--------|--------|--------|
| <b>1</b>                                        |        | 19.S   | -1.836 | 0.776                                           | -1.088 |        |        |
| <b>E (<math>\epsilon = 1</math>) = -6.3839</b>  |        | 20.C   | -3.372 | 0.504                                           | -0.112 |        |        |
| <b>E (<math>\epsilon = 4</math>) = -6.3933</b>  |        | 21.H   | -3.321 | 1.192                                           | 0.740  |        |        |
| <b>E (<math>\epsilon = 10</math>) = -6.3959</b> |        | 22.H   | -4.244 | 0.744                                           | -0.733 |        |        |
| <b>E (<math>\epsilon = 40</math>) = -6.3973</b> |        | 23.H   | -3.415 | -0.528                                          | 0.251  |        |        |
| 1.Fe                                            | -0.005 | -0.010 | 0.008  | 24.H                                            | -2.122 | -0.177 | -2.022 |
| 2.Fe                                            | 2.546  | -0.003 | 0.006  | 25.C                                            | -0.473 | -1.714 | 0.206  |
| 3.S                                             | 1.271  | 1.937  | 0.018  | 26.O                                            | -0.782 | -2.828 | 0.352  |
| 4.C                                             | 1.315  | 2.723  | -1.705 | 27.C                                            | -0.448 | 0.356  | 1.696  |
| 5.N                                             | 1.947  | 2.003  | -2.768 | 28.O                                            | -0.731 | 0.578  | 2.803  |
| 6.C                                             | 1.344  | 0.756  | -3.124 |                                                 |        |        |        |
| 7.S                                             | 1.266  | -0.627 | -1.826 | <b>1*</b>                                       |        |        |        |
| 8.H                                             | 0.303  | 0.928  | -3.441 | <b>E (<math>\epsilon = 1</math>) = -6.3737</b>  |        |        |        |
| 9.H                                             | 1.897  | 0.304  | -3.958 | <b>E (<math>\epsilon = 4</math>) = -6.3855</b>  |        |        |        |
| 10.H                                            | 2.950  | 1.892  | -2.595 | <b>E (<math>\epsilon = 10</math>) = -6.3887</b> |        |        |        |
| 11.H                                            | 0.264  | 2.923  | -1.964 | <b>E (<math>\epsilon = 40</math>) = -6.3905</b> |        |        |        |
| 12.H                                            | 1.832  | 3.680  | -1.551 | 1.Fe                                            | -0.001 | -0.003 | 0.001  |
| 13.C                                            | 2.883  | 0.344  | 1.738  | 2.Fe                                            | 2.617  | -0.002 | 0.006  |
| 14.O                                            | 3.105  | 0.556  | 2.855  | 3.S                                             | 1.341  | 1.963  | -0.002 |
| 15.C                                            | 4.127  | 0.498  | -0.693 | 4.C                                             | 1.387  | 2.685  | -1.753 |
| 16.O                                            | 5.164  | 0.807  | -1.120 | 5.N                                             | 2.039  | 1.919  | -2.773 |
| 17.C                                            | 2.878  | -1.757 | 0.234  | 6.C                                             | 1.403  | 0.689  | -3.128 |
| 18.O                                            | 3.099  | -2.885 | 0.382  | 7.S                                             | 1.350  | -0.701 | -1.833 |

|                            |        |        |        |      |       |        |        |
|----------------------------|--------|--------|--------|------|-------|--------|--------|
| 8.H                        | 0.368  | 0.893  | -3.442 | 2.F  | 3.243 | -0.274 | 0.988  |
| 9.H                        | 1.938  | 0.221  | -3.965 | 3.F  | 1.956 | 1.847  | -0.351 |
| 10.H                       | 3.028  | 1.768  | -2.544 | 4.O  | 1.400 | 1.274  | 2.345  |
| 11.H                       | 0.346  | 2.882  | -2.048 | 5.C  | 1.721 | 1.164  | 3.489  |
| 12.H                       | 1.907  | 3.643  | -1.619 | 6.Al | 1.807 | 0.511  | 0.607  |
| 13.C                       | 3.798  | 0.811  | 1.049  | 7.Fe | 2.037 | 1.002  | 5.191  |
| 14.O                       | 4.573  | 1.346  | 1.731  | 8.Fe | 3.425 | 0.233  | 7.197  |
| 15.C                       | 1.636  | -0.799 | 1.312  | 9.S  | 2.685 | -1.201 | 5.524  |
| 16.O                       | 1.553  | -1.417 | 2.309  | 10.C | 4.107 | -1.644 | 4.326  |
| 17.C                       | 3.717  | -1.365 | -0.286 | 11.N | 4.686 | -0.612 | 3.548  |
| 18.O                       | 4.440  | -2.256 | -0.472 | 12.C | 5.312 | 0.454  | 4.234  |
| 19.S                       | -1.637 | 0.842  | -1.413 | 13.S | 4.284 | 1.508  | 5.461  |
| 20.C                       | -3.303 | 0.650  | -0.661 | 14.H | 6.148 | 0.085  | 4.850  |
| 21.H                       | -3.362 | 1.381  | 0.153  | 15.H | 5.691 | 1.192  | 3.516  |
| 22.H                       | -4.064 | 0.878  | -1.417 | 16.H | 4.135 | -0.347 | 2.725  |
| 23.H                       | -3.434 | -0.361 | -0.260 | 17.H | 4.859 | -2.115 | 4.980  |
| 24.H                       | -1.795 | -0.152 | -2.333 | 18.H | 3.667 | -2.405 | 3.669  |
| 25.C                       | -0.717 | -1.634 | 0.109  | 19.S | 5.298 | -0.896 | 7.803  |
| 26.O                       | -1.202 | -2.687 | 0.186  | 20.C | 5.259 | -1.344 | 9.587  |
| 27.C                       | -0.754 | 0.575  | 1.515  | 21.H | 4.497 | -2.130 | 9.692  |
| 28.O                       | -1.252 | 0.959  | 2.491  | 22.H | 6.243 | -1.738 | 9.881  |
|                            |        |        |        | 23.H | 4.980 | -0.474 | 10.197 |
| <b>1/AlF<sub>3</sub></b>   |        |        |        | 24.H | 6.256 | 0.065  | 7.942  |
| <b>E (ε = 1) = -7.1625</b> |        |        |        | 25.C | 3.584 | 1.645  | 8.272  |
| 1.F                        | 0.491  | -0.454 | 0.417  | 26.O | 3.675 | 2.562  | 8.983  |

|                            |        |        |        |                             |        |        |        |
|----------------------------|--------|--------|--------|-----------------------------|--------|--------|--------|
| 27.C                       | 2.236  | -0.534 | 8.288  | 17.Al                       | -1.400 | 2.339  | -3.605 |
| 28.O                       | 1.453  | -1.016 | 9.000  | 18.F                        | -2.039 | 3.866  | -3.395 |
| 29.C                       | 0.399  | 0.439  | 5.720  | 19.F                        | -2.409 | 1.059  | -3.207 |
| 30.O                       | -0.650 | 0.087  | 6.047  | 20.F                        | -0.444 | 2.060  | -4.945 |
| 31.C                       | 1.725  | 2.685  | 5.797  | 21.C                        | 1.038  | 3.904  | 0.339  |
| 32.O                       | 1.513  | 3.758  | 6.170  | 22.O                        | 0.694  | 4.996  | 0.512  |
| <b>1*/AlF<sub>3</sub></b>  |        |        |        | 23.S                        | -0.260 | -1.824 | 1.233  |
| <b>E (ε = 1) = -7.1587</b> |        |        |        | 24.C                        | -1.330 | -3.032 | 0.352  |
| 1.Fe                       | 0.012  | 0.121  | -0.096 | 25.H                        | -0.720 | -3.460 | -0.451 |
| 2.S                        | 2.424  | 0.040  | 0.006  | 26.H                        | -1.619 | -3.822 | 1.054  |
| 3.Fe                       | 1.578  | 2.223  | 0.082  | 27.H                        | -2.210 | -2.537 | -0.072 |
| 4.S                        | 0.198  | 1.547  | 1.846  | 28.H                        | -1.207 | -1.433 | 2.133  |
| 5.C                        | 1.280  | 0.656  | 3.135  | 29.C                        | -1.758 | 0.416  | -0.117 |
| 6.N                        | 2.656  | 0.438  | 2.830  | 30.O                        | -2.902 | 0.573  | -0.073 |
| 7.C                        | 2.931  | -0.469 | 1.761  | 31.C                        | 0.055  | -0.808 | -1.631 |
| 8.H                        | 2.450  | -1.437 | 1.966  | 32.O                        | 0.097  | -1.414 | -2.615 |
| 9.H                        | 4.014  | -0.624 | 1.671  | <b>1/AlCl<sub>3</sub></b>   |        |        |        |
| 10.H                       | 3.162  | 1.322  | 2.715  | <b>E (ε = 1) = -6.9066</b>  |        |        |        |
| 11.H                       | 0.800  | -0.306 | 3.361  | <b>E (ε = 4) = -6.9198</b>  |        |        |        |
| 12.H                       | 1.188  | 1.306  | 4.015  | <b>E (ε = 10) = -6.9231</b> |        |        |        |
| 13.C                       | 2.843  | 2.734  | -1.062 | <b>E (ε = 40) = -6.9249</b> |        |        |        |
| 14.O                       | 3.670  | 3.071  | -1.802 | 1.Fe                        | 0.110  | 0.032  | -0.116 |
| 15.C                       | 0.324  | 1.790  | -1.152 | 2.Fe                        | 2.663  | -0.073 | 0.108  |
| 16.O                       | -0.147 | 2.264  | -2.168 | 3.S                         | 1.411  | 1.786  | 0.700  |

|      |        |        |        |                             |        |        |        |
|------|--------|--------|--------|-----------------------------|--------|--------|--------|
| 4.C  | 1.687  | 3.139  | -0.611 | 29.Al                       | 6.786  | 1.038  | -1.692 |
| 5.N  | 2.373  | 2.805  | -1.810 | 30.Cl                       | 7.938  | 2.484  | -0.832 |
| 6.C  | 1.788  | 1.811  | -2.636 | 31.Cl                       | 5.487  | 1.847  | -3.182 |
| 7.S  | 1.547  | 0.056  | -1.923 | 32.Cl                       | 7.598  | -0.842 | -2.164 |
| 8.H  | 0.782  | 2.122  | -2.961 |                             |        |        |        |
| 9.H  | 2.422  | 1.641  | -3.514 | <b>1*/AlCl<sub>3</sub></b>  |        |        |        |
| 10.H | 3.381  | 2.662  | -1.695 | <b>E (ε = 1) = -6.9085</b>  |        |        |        |
| 11.H | 0.674  | 3.506  | -0.838 | <b>E (ε = 4) = -6.9285</b>  |        |        |        |
| 12.H | 2.238  | 3.917  | -0.067 | <b>E (ε = 10) = -6.9338</b> |        |        |        |
| 13.C | 2.722  | -0.416 | 1.886  | <b>E (ε = 40) = -6.9365</b> |        |        |        |
| 14.O | 2.785  | -0.639 | 3.017  |                             |        |        |        |
| 15.C | 4.309  | 0.435  | -0.160 | 1.Fe                        | -0.016 | 0.131  | -0.076 |
| 16.O | 5.493  | 0.554  | -0.291 | 2.S                         | 2.395  | -0.016 | -0.028 |
| 17.C | 2.889  | -1.822 | -0.299 | 3.Fe                        | 1.601  | 2.184  | 0.041  |
| 18.O | 3.046  | -2.938 | -0.554 | 4.S                         | 0.250  | 1.566  | 1.847  |
| 19.S | -1.589 | 1.249  | -1.001 | 5.C                         | 1.341  | 0.664  | 3.121  |
| 20.C | -3.224 | 0.642  | -0.417 | 6.N                         | 2.703  | 0.404  | 2.785  |
| 21.H | -3.294 | 0.912  | 0.643  | 7.C                         | 2.925  | -0.523 | 1.721  |
| 22.H | -4.016 | 1.150  | -0.982 | 8.H                         | 2.421  | -1.473 | 1.948  |
| 23.H | -3.292 | -0.445 | -0.528 | 9.H                         | 4.002  | -0.711 | 1.608  |
| 24.H | -1.731 | 0.765  | -2.269 | 10.H                        | 3.229  | 1.272  | 2.647  |
| 25.C | -0.413 | -1.598 | -0.612 | 11.H                        | 0.841  | -0.282 | 3.374  |
| 26.O | -0.756 | -2.663 | -0.930 | 12.H                        | 1.290  | 1.329  | 3.994  |
| 27.C | -0.525 | -0.198 | 1.539  | 13.C                        | 2.852  | 2.646  | -1.140 |
| 28.O | -0.930 | -0.367 | 2.616  | 14.O                        | 3.670  | 2.952  | -1.901 |

|                           |        |        |        |      |       |        |         |
|---------------------------|--------|--------|--------|------|-------|--------|---------|
| 15.C                      | 0.297  | 1.799  | -1.152 | 5.O  | 3.117 | -1.013 | -1.725  |
| 16.O                      | -0.193 | 2.296  | -2.152 | 6.C  | 3.092 | -1.147 | -2.910  |
| 17.Al                     | -1.423 | 2.435  | -3.616 | 7.Fe | 2.983 | -1.484 | -4.618  |
| 18.Cl                     | -2.505 | 4.187  | -3.103 | 8.Fe | 2.707 | -0.830 | -7.080  |
| 19.Cl                     | -2.557 | 0.623  | -3.508 | 9.S  | 1.196 | -0.241 | -5.413  |
| 20.Cl                     | -0.123 | 2.561  | -5.288 | 10.C | 1.409 | 1.581  | -4.902  |
| 21.C                      | 1.141  | 3.886  | 0.310  | 11.N | 2.638 | 1.993  | -4.323  |
| 22.O                      | 0.853  | 4.995  | 0.485  | 12.C | 3.815 | 1.836  | -5.095  |
| 23.S                      | -0.317 | -1.782 | 1.292  | 13.S | 4.311 | 0.089  | -5.689  |
| 24.C                      | -1.449 | -2.969 | 0.460  | 14.H | 3.749 | 2.425  | -6.024  |
| 25.H                      | -0.874 | -3.432 | -0.350 | 15.H | 4.687 | 2.170  | -4.519  |
| 26.H                      | -1.747 | -3.736 | 1.185  | 16.H | 2.744 | 1.735  | -3.336  |
| 27.H                      | -2.323 | -2.453 | 0.047  | 17.H | 1.212 | 2.140  | -5.831  |
| 28.H                      | -1.228 | -1.342 | 2.206  | 18.H | 0.588 | 1.752  | -4.194  |
| 29.C                      | -1.779 | 0.460  | -0.059 | 19.S | 2.377 | 0.932  | -8.472  |
| 30.O                      | -2.918 | 0.642  | 0.023  | 20.C | 1.917 | 0.381  | -10.167 |
| 31.C                      | 0.017  | -0.844 | -1.584 | 21.H | 0.897 | -0.023 | -10.096 |
| 32.O                      | 0.091  | -1.506 | -2.528 | 22.H | 1.926 | 1.250  | -10.841 |
| <b>1/AlBr<sub>3</sub></b> |        |        |        | 23.H | 2.603 | -0.401 | -10.518 |
| <b>E = -6.8320</b>        |        |        |        | 24.H | 3.632 | 1.342  | -8.819  |
| 1.Br                      | 0.055  | -0.597 | -0.454 | 25.C | 4.009 | -1.660 | -7.972  |
| 2.Al                      | 2.275  | -0.082 | -0.175 | 26.O | 4.851 | -2.210 | -8.557  |
| 3.Br                      | 2.849  | 2.102  | -0.712 | 27.C | 1.476 | -1.956 | -7.723  |
| 4.Br                      | 3.384  | -1.007 | 1.597  | 28.O | 0.690 | -2.704 | -8.140  |
|                           |        |        |        | 29.C | 1.808 | -2.861 | -4.558  |

|      |       |        |        |
|------|-------|--------|--------|
| 30.O | 1.067 | -3.745 | -4.509 |
|------|-------|--------|--------|

|      |       |        |        |
|------|-------|--------|--------|
| 31.C | 4.382 | -2.619 | -4.846 |
|------|-------|--------|--------|

|      |       |        |        |
|------|-------|--------|--------|
| 32.O | 5.270 | -3.346 | -4.974 |
|------|-------|--------|--------|

**1\*/AlBr<sub>3</sub>****E = -6.8305**

|      |       |       |        |
|------|-------|-------|--------|
| 1.Br | 0.006 | 0.024 | -0.008 |
|------|-------|-------|--------|

|      |       |       |        |
|------|-------|-------|--------|
| 2.Al | 2.313 | 0.002 | -0.000 |
|------|-------|-------|--------|

|      |       |       |        |
|------|-------|-------|--------|
| 3.Br | 3.295 | 2.105 | -0.011 |
|------|-------|-------|--------|

|      |       |        |       |
|------|-------|--------|-------|
| 4.Br | 3.327 | -1.528 | 1.387 |
|------|-------|--------|-------|

|     |       |        |        |
|-----|-------|--------|--------|
| 5.O | 2.705 | -0.700 | -1.740 |
|-----|-------|--------|--------|

|     |       |        |        |
|-----|-------|--------|--------|
| 6.C | 2.870 | -0.699 | -2.949 |
|-----|-------|--------|--------|

|      |       |        |        |
|------|-------|--------|--------|
| 7.Fe | 2.723 | -1.851 | -4.336 |
|------|-------|--------|--------|

|      |       |       |        |
|------|-------|-------|--------|
| 8.Fe | 3.469 | 0.662 | -4.303 |
|------|-------|-------|--------|

|     |       |        |        |
|-----|-------|--------|--------|
| 9.S | 4.792 | -1.157 | -5.182 |
|-----|-------|--------|--------|

|      |       |        |        |
|------|-------|--------|--------|
| 10.C | 4.694 | -1.126 | -7.078 |
|------|-------|--------|--------|

|      |       |        |        |
|------|-------|--------|--------|
| 11.N | 3.432 | -1.402 | -7.689 |
|------|-------|--------|--------|

|      |       |        |        |
|------|-------|--------|--------|
| 12.C | 2.399 | -0.444 | -7.465 |
|------|-------|--------|--------|

|      |       |        |        |
|------|-------|--------|--------|
| 13.S | 1.718 | -0.237 | -5.697 |
|------|-------|--------|--------|

|      |       |       |        |
|------|-------|-------|--------|
| 14.H | 2.739 | 0.544 | -7.806 |
|------|-------|-------|--------|

|      |       |        |        |
|------|-------|--------|--------|
| 15.H | 1.502 | -0.721 | -8.035 |
|------|-------|--------|--------|

|      |       |        |        |
|------|-------|--------|--------|
| 16.H | 3.115 | -2.356 | -7.491 |
|------|-------|--------|--------|

|      |       |        |        |
|------|-------|--------|--------|
| 17.H | 5.053 | -0.137 | -7.400 |
|------|-------|--------|--------|

|      |       |        |        |
|------|-------|--------|--------|
| 18.H | 5.429 | -1.885 | -7.376 |
|------|-------|--------|--------|

|      |       |       |        |
|------|-------|-------|--------|
| 19.S | 4.158 | 2.192 | -5.984 |
|------|-------|-------|--------|

|      |       |       |        |
|------|-------|-------|--------|
| 20.C | 4.712 | 3.763 | -5.201 |
|------|-------|-------|--------|

|      |       |       |        |
|------|-------|-------|--------|
| 21.H | 5.689 | 3.558 | -4.742 |
|------|-------|-------|--------|

|      |       |       |        |
|------|-------|-------|--------|
| 22.H | 4.826 | 4.525 | -5.986 |
|------|-------|-------|--------|

|      |       |       |        |
|------|-------|-------|--------|
| 23.H | 4.000 | 4.091 | -4.431 |
|------|-------|-------|--------|

|      |       |       |        |
|------|-------|-------|--------|
| 24.H | 2.968 | 2.680 | -6.436 |
|------|-------|-------|--------|

|      |       |       |        |
|------|-------|-------|--------|
| 25.C | 2.307 | 1.856 | -3.636 |
|------|-------|-------|--------|

|      |       |       |        |
|------|-------|-------|--------|
| 26.O | 1.548 | 2.648 | -3.272 |
|------|-------|-------|--------|

|      |       |       |        |
|------|-------|-------|--------|
| 27.C | 4.855 | 1.085 | -3.241 |
|------|-------|-------|--------|

|      |       |       |        |
|------|-------|-------|--------|
| 28.O | 5.785 | 1.339 | -2.603 |
|------|-------|-------|--------|

|      |       |        |        |
|------|-------|--------|--------|
| 29.C | 3.539 | -3.231 | -3.558 |
|------|-------|--------|--------|

|      |       |        |        |
|------|-------|--------|--------|
| 30.O | 4.070 | -4.131 | -3.058 |
|------|-------|--------|--------|

|      |       |        |        |
|------|-------|--------|--------|
| 31.C | 1.107 | -2.483 | -3.916 |
|------|-------|--------|--------|

|      |       |        |        |
|------|-------|--------|--------|
| 32.O | 0.061 | -2.905 | -3.653 |
|------|-------|--------|--------|

**2****E (ε = 1) = -6.7715****E (ε = 4) = -6.8617****E (ε = 10) = -6.8826****E (ε = 40) = -6.8936**

|      |        |       |       |
|------|--------|-------|-------|
| 1.Fe | -0.003 | 0.006 | 0.013 |
|------|--------|-------|-------|

|     |       |        |        |
|-----|-------|--------|--------|
| 2.S | 2.400 | -0.024 | -0.004 |
|-----|-------|--------|--------|

|      |       |       |       |
|------|-------|-------|-------|
| 3.Fe | 1.498 | 2.139 | 0.028 |
|------|-------|-------|-------|

|     |       |       |       |
|-----|-------|-------|-------|
| 4.S | 0.193 | 1.513 | 1.871 |
|-----|-------|-------|-------|

|     |       |       |       |
|-----|-------|-------|-------|
| 5.C | 1.309 | 0.783 | 3.131 |
|-----|-------|-------|-------|

|     |       |       |       |
|-----|-------|-------|-------|
| 6.N | 2.741 | 0.676 | 2.676 |
|-----|-------|-------|-------|

|       |        |        |        |                                                 |        |        |        |
|-------|--------|--------|--------|-------------------------------------------------|--------|--------|--------|
| 7.C   | 2.997  | -0.427 | 1.675  | 32.C                                            | 0.035  | -0.996 | -1.491 |
| 8.H   | 2.536  | -1.340 | 2.079  | 33.O                                            | 0.136  | -1.679 | -2.412 |
| 9.H   | 4.087  | -0.559 | 1.615  |                                                 |        |        |        |
| 10.H  | 2.996  | 1.581  | 2.215  | <b>3</b>                                        |        |        |        |
| 11.H  | 3.359  | 0.549  | 3.496  | <b>E (<math>\epsilon = 1</math>) = -6.9915</b>  |        |        |        |
| 12.H  | 0.999  | -0.223 | 3.446  | <b>E (<math>\epsilon = 4</math>) = -7.0285</b>  |        |        |        |
| 13.H  | 1.293  | 1.456  | 4.000  | <b>E (<math>\epsilon = 10</math>) = -7.0385</b> |        |        |        |
| 14.C  | 2.716  | 2.662  | -1.174 | <b>E (<math>\epsilon = 40</math>) = -7.0439</b> |        |        |        |
| 15.O  | 3.502  | 3.000  | -1.946 | 1.Fe                                            | -0.035 | -0.014 | -0.021 |
| 16.C  | 0.200  | 1.679  | -1.163 | 2.S                                             | 2.350  | -0.078 | -0.065 |
| 17.O  | -0.320 | 2.090  | -2.166 | 3.Fe                                            | 1.481  | 2.135  | 0.008  |
| 18.Al | -1.667 | 2.071  | -3.657 | 4.S                                             | 0.129  | 1.485  | 1.857  |
| 19.Cl | -2.765 | 3.792  | -3.141 | 5.C                                             | 1.398  | 0.947  | 3.083  |
| 20.Cl | -2.618 | 0.198  | -3.253 | 6.N                                             | 2.766  | 0.934  | 2.466  |
| 21.Cl | -0.365 | 2.099  | -5.307 | 7.C                                             | 3.049  | -0.279 | 1.622  |
| 22.C  | 0.981  | 3.840  | 0.246  | 8.H                                             | 2.645  | -1.158 | 2.145  |
| 23.O  | 0.652  | 4.936  | 0.384  | 9.H                                             | 4.140  | -0.365 | 1.530  |
| 24.S  | -0.220 | -1.880 | 1.408  | 10.H                                            | 2.769  | 1.778  | 1.759  |
| 25.C  | -1.063 | -3.274 | 0.552  | 11.H                                            | 3.497  | 1.061  | 3.183  |
| 26.H  | -0.340 | -3.691 | -0.158 | 12.H                                            | 1.202  | -0.052 | 3.494  |
| 27.H  | -1.320 | -4.028 | 1.305  | 13.H                                            | 1.411  | 1.688  | 3.895  |
| 28.H  | -1.955 | -2.919 | 0.025  | 14.C                                            | 2.801  | 2.657  | -1.049 |
| 29.H  | -1.272 | -1.540 | 2.206  | 15.O                                            | 3.669  | 3.003  | -1.742 |
| 30.C  | -1.794 | 0.251  | 0.031  | 16.C                                            | 0.169  | 1.687  | -1.197 |
| 31.O  | -2.932 | 0.372  | 0.149  | 17.O                                            | -0.390 | 2.064  | -2.208 |

|                                                 |        |        |        |       |        |        |        |
|-------------------------------------------------|--------|--------|--------|-------|--------|--------|--------|
| 18.Al                                           | -1.635 | 2.111  | -3.650 | 4.S   | 0.092  | 1.508  | 1.870  |
| 19.Cl                                           | -2.766 | 3.860  | -3.211 | 5.C   | 1.445  | 1.100  | 3.084  |
| 20.Cl                                           | -2.719 | 0.277  | -3.463 | 6.N   | 2.759  | 1.166  | 2.425  |
| 21.Cl                                           | -0.356 | 2.217  | -5.347 | 7.C   | 3.129  | -0.043 | 1.670  |
| 22.C                                            | 1.075  | 3.825  | 0.347  | 8.H   | 2.814  | -0.952 | 2.203  |
| 23.O                                            | 0.814  | 4.937  | 0.570  | 9.H   | 4.218  | -0.053 | 1.527  |
| 24.S                                            | -0.147 | -2.021 | 1.662  | 10.H  | 2.533  | 2.056  | 1.436  |
| 25.C                                            | -0.908 | -3.479 | 0.842  | 11.H  | 3.502  | 1.473  | 3.064  |
| 26.H                                            | -0.156 | -3.870 | 0.146  | 12.H  | 1.281  | 0.109  | 3.530  |
| 27.H                                            | -1.153 | -4.243 | 1.589  | 13.H  | 1.402  | 1.870  | 3.865  |
| 28.H                                            | -1.799 | -3.176 | 0.280  | 14.C  | 0.154  | 1.698  | -1.218 |
| 29.H                                            | -1.236 | -1.668 | 2.396  | 15.O  | -0.410 | 1.994  | -2.244 |
| 30.C                                            | -1.814 | 0.141  | 0.025  | 16.Al | -1.610 | 1.979  | -3.754 |
| 31.O                                            | -2.967 | 0.222  | 0.119  | 17.Cl | -2.729 | 3.756  | -3.442 |
| 32.C                                            | -0.053 | -1.090 | -1.445 | 18.Cl | -2.701 | 0.162  | -3.497 |
| 33.O                                            | -0.020 | -1.814 | -2.350 | 19.Cl | -0.246 | 1.988  | -5.382 |
| <b>TS 3-4</b>                                   |        |        |        | 20.C  | 2.761  | 2.720  | -1.005 |
| <b>E (<math>\epsilon = 1</math>) = -6.9875</b>  |        |        |        | 21.O  | 3.632  | 3.099  | -1.672 |
| <b>E (<math>\epsilon = 4</math>) = -7.0159</b>  |        |        |        | 22.C  | 0.986  | 3.847  | 0.391  |
| <b>E (<math>\epsilon = 10</math>) = -7.0236</b> |        |        |        | 23.O  | 0.718  | 4.952  | 0.627  |
| <b>E (<math>\epsilon = 40</math>) = -7.0278</b> |        |        |        | 24.S  | -0.071 | -1.955 | 1.693  |
| 1.Fe                                            | -0.002 | -0.015 | 0.026  | 25.C  | -0.736 | -3.474 | 0.898  |
| 2.S                                             | 2.374  | 0.002  | -0.030 | 26.H  | 0.052  | -3.846 | 0.233  |
| 3.Fe                                            | 1.435  | 2.167  | 0.033  | 27.H  | -0.956 | -4.227 | 1.664  |
|                                                 |        |        |        | 28.H  | -1.629 | -3.239 | 0.308  |

29.H -1.192 -1.650 2.400  
30.C -1.787 0.129 0.040  
31.O -2.941 0.210 0.108  
32.C 0.021 -1.104 -1.393  
33.O 0.074 -1.838 -2.288

**4**

**E ( $\epsilon = 1$ ) = -7.0121**

**E ( $\epsilon = 4$ ) = -7.0318**

**E ( $\epsilon = 10$ ) = -7.0404**

**E ( $\epsilon = 40$ ) = -7.0452**

1.Fe 0.012 0.035 -0.010  
2.S 2.388 -0.011 0.012  
3.Fe 1.560 2.181 0.053  
4.S 0.193 1.510 1.839  
5.C 1.383 0.793 3.145  
6.N 2.751 0.611 2.785  
7.C 3.021 -0.356 1.772  
8.H 2.605 -1.332 2.061  
9.H 4.106 -0.455 1.635  
10.H 3.176 1.513 2.538  
11.H 0.951 -0.165 3.469  
12.H 1.308 1.512 3.971  
13.C 2.736 2.615 -1.224  
14.O 3.512 2.923 -2.022

15.C 0.178 1.645 -1.172  
16.O -0.381 2.025 -2.179  
17.Al -1.658 2.063 -3.630  
18.Cl -2.787 3.784 -3.123  
19.Cl -2.682 0.203 -3.420  
20.Cl -0.381 2.198 -5.317  
21.C 0.947 3.855 0.234  
22.O 0.592 4.947 0.349  
23.H 2.683 2.704 0.980  
24.S -0.190 -1.975 1.487  
25.C -1.186 -3.277 0.656  
26.H -0.541 -3.716 -0.114  
27.H -1.457 -4.046 1.388  
28.H -2.078 -2.846 0.187  
29.H -1.168 -1.564 2.341  
30.C -1.779 0.237 0.043  
31.O -2.926 0.344 0.136  
32.C 0.072 -1.019 -1.472  
33.O 0.151 -1.718 -2.389

**5**

**E ( $\epsilon = 1$ ) = -6.8852**

**E ( $\epsilon = 4$ ) = -6.9576**

**E ( $\epsilon = 10$ ) = -6.9865**

**E ( $\epsilon = 40$ ) = -6.9964**

|       |        |        |        |                                                 |        |        |        |
|-------|--------|--------|--------|-------------------------------------------------|--------|--------|--------|
| 1.Fe  | -0.001 | 0.031  | 0.008  | 26.C                                            | -0.939 | -3.426 | 0.569  |
| 2.S   | 2.367  | -0.061 | 0.008  | 27.H                                            | -0.140 | -3.800 | -0.081 |
| 3.Fe  | 1.581  | 2.162  | 0.089  | 28.H                                            | -1.205 | -4.194 | 1.305  |
| 4.S   | 0.154  | 1.502  | 1.858  | 29.H                                            | -1.809 | -3.134 | -0.028 |
| 5.C   | 1.324  | 0.861  | 3.131  | 30.H                                            | -1.380 | -1.676 | 2.171  |
| 6.N   | 2.732  | 0.786  | 2.628  | 31.C                                            | -1.806 | 0.253  | 0.030  |
| 7.C   | 3.012  | -0.358 | 1.704  | 32.O                                            | -2.946 | 0.369  | 0.122  |
| 8.H   | 2.588  | -1.276 | 2.135  | 33.C                                            | 0.020  | -1.012 | -1.481 |
| 9.H   | 4.103  | -0.458 | 1.623  | 34.O                                            | 0.092  | -1.707 | -2.393 |
| 10.H  | 2.858  | 1.689  | 2.011  |                                                 |        |        |        |
| 11.H  | 3.400  | 0.790  | 3.415  | <b>6</b>                                        |        |        |        |
| 12.H  | 1.023  | -0.132 | 3.490  | <b>E (<math>\epsilon = 1</math>) = -7.1451</b>  |        |        |        |
| 13.H  | 1.308  | 1.575  | 3.966  | <b>E (<math>\epsilon = 4</math>) = -7.1668</b>  |        |        |        |
| 14.C  | 2.719  | 2.589  | -1.239 | <b>E (<math>\epsilon = 10</math>) = -7.1724</b> |        |        |        |
| 15.O  | 3.457  | 2.880  | -2.070 | <b>E (<math>\epsilon = 40</math>) = -7.1755</b> |        |        |        |
| 16.C  | 0.178  | 1.642  | -1.153 | 1.Fe                                            | -0.024 | -0.002 | -0.038 |
| 17.O  | -0.347 | 2.052  | -2.147 | 2.S                                             | 2.378  | -0.005 | -0.027 |
| 18.Al | -1.685 | 2.093  | -3.678 | 3.Fe                                            | 1.634  | 2.272  | 0.057  |
| 19.Cl | -2.752 | 3.815  | -3.102 | 4.S                                             | 0.162  | 1.532  | 1.802  |
| 20.Cl | -2.639 | 0.220  | -3.327 | 5.C                                             | 1.280  | 0.752  | 3.083  |
| 21.Cl | -0.330 | 2.175  | -5.284 | 6.N                                             | 2.661  | 0.633  | 2.676  |
| 22.C  | 0.954  | 3.847  | 0.223  | 7.C                                             | 2.943  | -0.406 | 1.710  |
| 23.O  | 0.582  | 4.931  | 0.306  | 8.H                                             | 2.482  | -1.378 | 1.966  |
| 24.H  | 2.731  | 2.695  | 1.035  | 9.H                                             | 4.031  | -0.534 | 1.632  |
| 25.S  | -0.252 | -1.976 | 1.469  | 10.H                                            | 2.849  | 2.308  | 1.496  |

|       |        |        |        |
|-------|--------|--------|--------|
| 11.H  | 3.291  | 0.585  | 3.479  |
| 12.H  | 0.820  | -0.218 | 3.351  |
| 13.H  | 1.223  | 1.418  | 3.956  |
| 14.C  | 2.670  | 2.664  | -1.347 |
| 15.O  | 3.324  | 2.922  | -2.264 |
| 16.C  | 0.233  | 1.575  | -1.051 |
| 17.O  | -0.268 | 2.067  | -2.064 |
| 18.Al | -1.532 | 2.067  | -3.489 |
| 19.Cl | -2.714 | 3.774  | -3.017 |
| 20.Cl | -2.586 | 0.209  | -3.359 |
| 21.Cl | -0.271 | 2.237  | -5.195 |
| 22.C  | 0.889  | 3.898  | 0.115  |
| 23.O  | 0.401  | 4.945  | 0.135  |
| 24.H  | 2.962  | 2.980  | 1.068  |
| 25.S  | -0.213 | -2.035 | 1.495  |
| 26.C  | -1.335 | -3.232 | 0.663  |
| 27.H  | -0.752 | -3.692 | -0.143 |
| 28.H  | -1.637 | -4.002 | 1.381  |
| 29.H  | -2.208 | -2.722 | 0.240  |
| 30.H  | -1.126 | -1.579 | 2.396  |
| 31.C  | -1.804 | 0.153  | 0.032  |
| 32.O  | -2.953 | 0.224  | 0.158  |
| 33.C  | 0.024  | -1.079 | -1.467 |
| 34.O  | 0.110  | -1.812 | -2.359 |

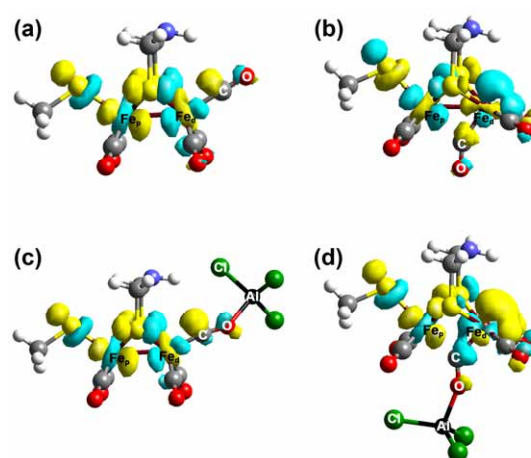

**Figure S1.** The lowest unoccupied molecular orbitals (LUMOs) of **1** (a), **1\*** (b), **1/AlCl<sub>3</sub>** (c), and **1\*/AlCl<sub>3</sub>** (d).
